# Supplementary material for: Facile synthesis benzene sensor based on V2O5-doped SnO2nanofibers
Source: Royal Society of Chemistry journal article supplement (doi:10.1039/c4ra06120a), 2014-09-11
Supplement: c4ra06120a1.pdf [file c4ra06120a1.pdf]

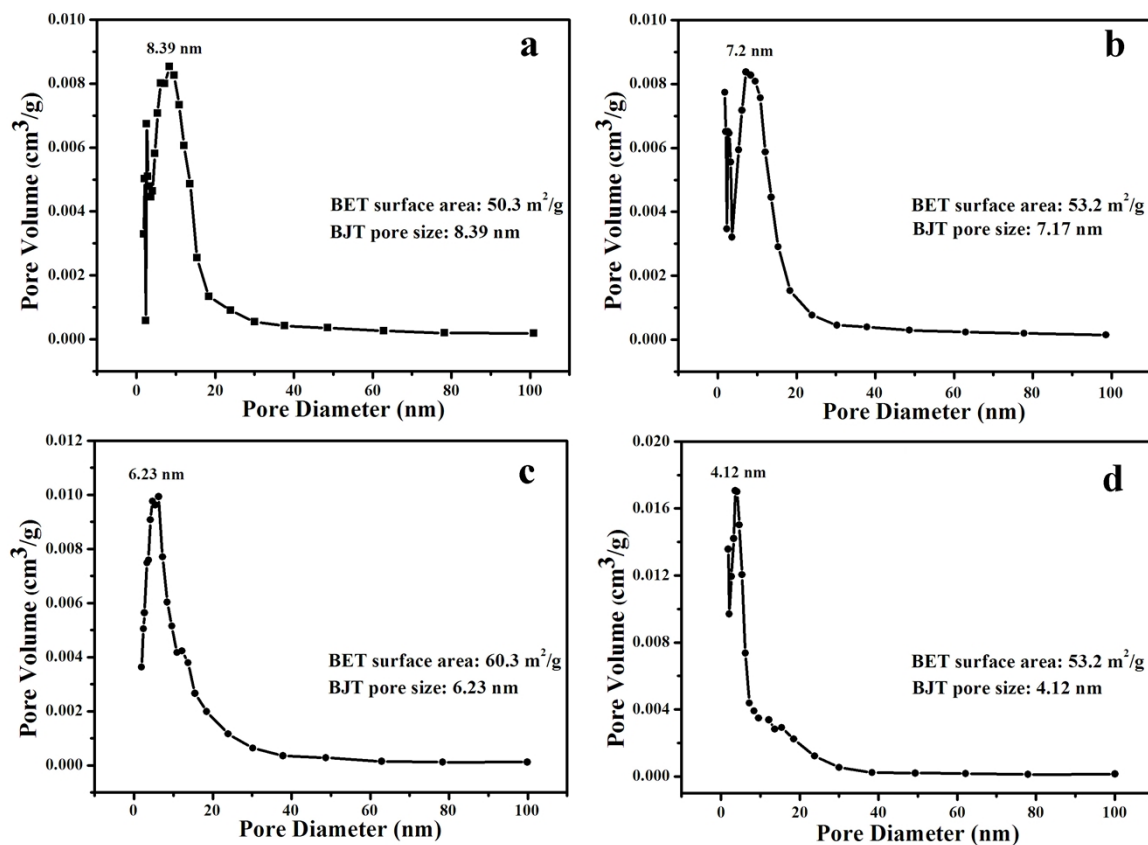

Fig.S1 the corresponding BJH pore size distribution plots and the BET surface areas of (a) S1,(b) S2, (c) S3 and (d) S4
